# Supplementary material for: Renin–angiotensin–aldosterone system inhibitors and the risk of mortality in patients with hypertension hospitalised for COVID-19: systematic review and meta-analysis
Source: PubMed Central journal article supplement — Open Heart. 2020 Nov 5;7(2):e001353. doi: 10.1136/openhrt-2020-001353 (PMC7646321; doi:10.1136/openhrt-2020-001353), 2020-11-05

**Supplementary material Renin-angiotensin-aldosterone system inhibitors and the risk of mortality in patients with hypertension hospitalized for COVID-19: systematic review and meta-analysis**

Anna E. Ssentongo, MPH<sup>§1,2\*</sup>, Paddy Ssentongo, MD, MPH<sup>1,3\*</sup>, Emily S. Heilbrunn, BS<sup>1\*</sup>, Alain Lekoubou, MD, Msc<sup>1,4</sup>, Ping Du, MD, PhD<sup>1</sup>, Duanping Liao, MD, PhD<sup>1</sup>, John S. Oh, MD<sup>2</sup>, Vernon M. Chinchilli, PhD<sup>1</sup>

<sup>1</sup>Department of Public Health Sciences, Penn State College of Medicine, Hershey, Pennsylvania, United States of America

<sup>2</sup>Department of Surgery, Penn State College of Medicine and Milton S. Hershey Medical Center, Hershey, Pennsylvania, United States of America

<sup>3</sup>Center for Neural Engineering, Department of Engineering, Science and Mechanics, The Pennsylvania State University, Pennsylvania, United States of America

<sup>4</sup>Department of Neurology, Penn State College of Medicine and Milton S. Hershey Medical Center, Hershey, Pennsylvania, United States of America

Word count: 2461

\*Authors contributed equally

**§Corresponding Author**

Anna Ssentongo, MPH

Penn State University

Department of Surgery

500 University Drive

Hershey, PA 17033 USA

Email: [assentongo@pennstatehealth.psu.edu](mailto:assentongo@pennstatehealth.psu.edu)

Tel: 814-404-5208

|                        | Topic                                                                                                                                                                                                                                                         | Page number |
|------------------------|---------------------------------------------------------------------------------------------------------------------------------------------------------------------------------------------------------------------------------------------------------------|-------------|
| <b>Title</b>           | Identify the study as a meta-analysis (or systematic review)                                                                                                                                                                                                  | 1           |
| <b>Abstract</b>        | Use the journal's structured format                                                                                                                                                                                                                           | 2           |
| <b>Introduction</b>    | <b>Present:</b>                                                                                                                                                                                                                                               |             |
|                        | The clinical problem                                                                                                                                                                                                                                          | 4-5         |
|                        | The hypothesis                                                                                                                                                                                                                                                | 4 -5        |
|                        | A statement of objectives that includes the study population, the condition of interest, the exposure or intervention, and the outcome(s) considered                                                                                                          | 4-5         |
| <b>Sources</b>         | <b>Describe:</b>                                                                                                                                                                                                                                              |             |
|                        | Qualifications of searchers (eg, librarians and investigators)                                                                                                                                                                                                | 5           |
|                        | Search strategy, including time period included in the synthesis and keywords                                                                                                                                                                                 | 5           |
|                        | Effort to include all available studies, including contact with authors                                                                                                                                                                                       | 5           |
|                        | Databases and registries searched                                                                                                                                                                                                                             | 5           |
|                        | Search software used, name and version, including special features used (e.g. explosion)                                                                                                                                                                      | 5           |
|                        | Use of hand searching (e.g, reference lists of obtained articles)                                                                                                                                                                                             | 5           |
|                        | List of citations located and those excluded, including justification                                                                                                                                                                                         | 5           |
|                        | Method of addressing articles published in languages other than English                                                                                                                                                                                       | 5           |
|                        | Method of handling abstracts and unpublished studies                                                                                                                                                                                                          | 5           |
|                        | Description of any contact with authors                                                                                                                                                                                                                       | 5           |
| <b>Study Selection</b> | <b>Describe</b>                                                                                                                                                                                                                                               |             |
|                        | Types of study designs considered                                                                                                                                                                                                                             | 6           |
|                        | Relevance or appropriateness of studies gathered for assessing the hypothesis to be tested                                                                                                                                                                    | 6           |
|                        | Rationale for the selection and coding of data (eg, sound clinical principles or convenience)                                                                                                                                                                 | 7           |
|                        | Documentation of how data were classified and coded (eg, multiple raters, blinding, and inter-rater reliability)                                                                                                                                              | 6           |
|                        | Assessment of confounding (e.g. comparability of cases and controls in studies where appropriate)                                                                                                                                                             | 7           |
|                        | Assessment of study quality, including blinding of quality assessors; stratification or regression on possible predictors of study results                                                                                                                    | 7           |
|                        | Assessment of heterogeneity                                                                                                                                                                                                                                   | 7           |
|                        | Statistical methods (eg, complete description of fixed or random effects models, justification of whether the chosen models account for predictors of study results, dose-response models, or cumulative meta-analysis) in sufficient detail to be replicated | 7           |
| <b>Results</b>         | <b>Present</b>                                                                                                                                                                                                                                                |             |
|                        | A graph summarizing individual study estimates and the overall estimate                                                                                                                                                                                       | Figure 2    |
|                        | A table giving descriptive information for each included study                                                                                                                                                                                                | Table 1     |

|                   |                                                               |     |
|-------------------|---------------------------------------------------------------|-----|
|                   | Results of sensitivity testing (eg, subgroup analysis)        | 8-9 |
|                   | Indication of statistical uncertainty of findings             | 8-9 |
| <b>Discussion</b> | <b>Discuss</b>                                                |     |
|                   | Strengths and weaknesses                                      | 12  |
|                   | Potential biases in the review process (eg, publication bias) | 12  |

**Supplemental Table 1:** Meta-Analyses and Systematic Reviews of Observational Studies (MOOSE) checklist

**Supplemental text 1: PubMed Search Terms**

(((((("receptors, angiotensin"[MeSH Terms] OR "angiotensin"[All Fields])) OR "angiotensin receptors"[All Fields]) OR ("angiotensin"[All Fields] OR "((((("angiotensin converting enzyme inhibitors"[Pharmacological Action] OR "angiotensin-converting enzyme inhibitors"[MeSH Terms]) OR ("angiotensin converting enzyme inhibitors"[All Fields]) OR OR "ace inhibitor"[All Fields])) OR "angiotensin-converting enzyme inhibitors"[MeSH Terms]) OR angiotensin converting enzyme inhibitors"[All Fields])

**Supplementary Figure 1.** Influential sensitivity analysis of random-effects meta-analysis of studies evaluating the association of ACEi/ARB with mortality in patients with hypertension hospitalized with COVID-19 (only study population hypertension)

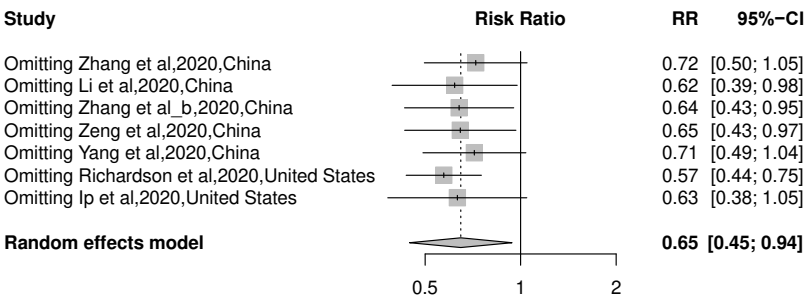

**Supplementary Figure 2.** Sensitivity analysis comparing RR estimates between studies with only mixture of patients with and without hypertension compared to studies consisting of only individuals with hypertension

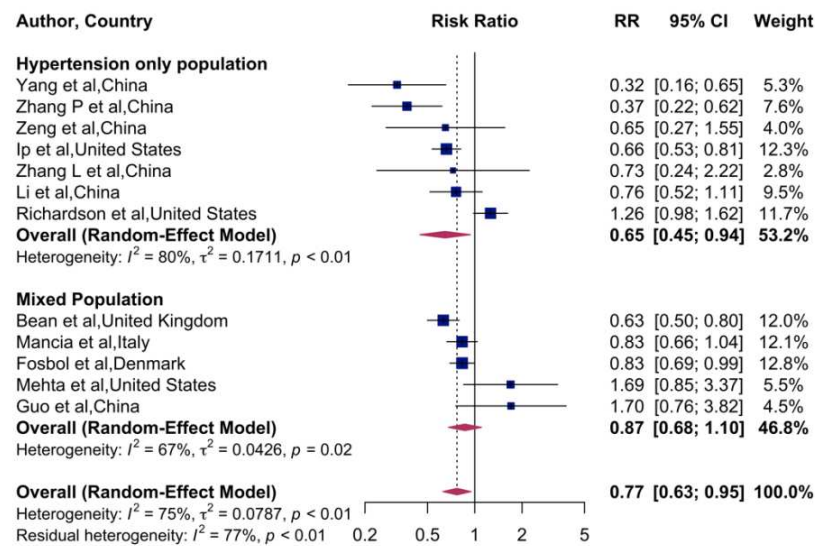

Supplement: openhrt-2020-001353supp001.pdf [file openhrt-2020-001353supp001.pdf]
